# Supplementary material
Source: PubMed Central journal article supplement (PMC6901075)
Supplement: btz407_supplementary_data.pdf [file btz407_supplementary_data.pdf]

# Augmented Interval List: a novel data structure for efficient genomic interval search

## Supplementary Information

Authors: Jianglin Feng, Aakrosh Ratan, and Nathan C. Sheffield

### 1. Allist augmented with SortedE

In this variant of the Allist data structure, the Allist is augmented directly with *SortedE*, the sorted list of interval ends, instead of the *MaxE*. So the basic data structure contains 3 elements: interval *start*, interval *end* and *SortedE*. Let *aiL* be a constructed Allist, *hSub* be the head info containing the start of the sublists in *aiL*. We seek to identify overlaps of Allist with a given *query*  $q = [start, end)$ . The search algorithm is listed in Algorithm S1.

For each sublist, we first find the index of the last interval  $I_E$  that has  $start < q.end$  with a binary search, which excludes all intervals on the right. Since *SortedE* is sorted by the end, we can find the index of the leftmost element  $I_S$  that has  $end > q.start$ . This indicates that there are  $I_S - 1$  elements on the left of  $I_S$  should be excluded and the number of intersections is, thus,  $I_E - I_S + 1$  (Layer *et al.*, 2013). This algorithm does not directly find  $I_S$ , instead it simultaneously enumerates *SortedE* and *aiL* from  $I_E$  to the left, so only one binary search is needed.

This search algorithm can slightly outperform the search algorithm of the *MaxE* version in cases such as wide queries ( $q.end \gg q.start$ ), but the sorting of the interval ends for *SortedE* is slower than finding the running maximum ends for *MaxE*. Generally *MaxE* version runs slightly faster than *SortedE* version, so the *MaxE* version is preferred.

---

#### Algorithm S1 Allist Search Algorithm

---

**Input:** Allist *aiL*, sublist header *hSub*, query  $[start, end)$

**Output:** Overlaps *H*

```
1: procedure ALLISTSEARCH(aiL, hSub, start, end)
2:    $H \leftarrow \emptyset$ 
3:   for  $i \leftarrow 1$  to  $|hSub| - 1$  do
4:      $k \leftarrow \text{BinarySearch}(aiL, hSub[i], hSub[i + 1] - 1, end)$ 
5:      $t \leftarrow 0$ 
6:     while  $k > hSub[i]$  and  $aiL[k].SortedE > start$  do
7:        $t \leftarrow t + 1$ 
8:       if  $aiL[k].end > start$  then
9:          $H \leftarrow H \cup aiL[k]$ 
10:         $t \leftarrow t - 1$ 
11:       end if
12:        $k \leftarrow k - 1$ 
13:     end while
14:     while  $t > 0$  do
15:       if  $aiL[k].end > start$  then
16:          $H \leftarrow H \cup aiL[k]$ 
17:          $t \leftarrow t - 1$ 
18:       end if
19:        $k \leftarrow k - 1$ 
20:     end while
21:   end for
22:   return H
23: end procedure
```

---

## 2. Relation of AIList with AITree and NCList

The AIList can be considered as a combination of AITree and NCList. It is helpful to get a detailed runtime break-down for their construction and search algorithms in order to understand their differences.

For the data structure construction algorithm, AITree involves a tree-balancing operation, so it is slower than AIList and NCList on data structure construction, see Table 1. For the flat dataset (Dataset 1) AIList takes slightly longer than NCList because of the coverage length  $len$  computing during decomposition, but in all other cases, AIList construction is more efficient than NCList.

For the query algorithm, AITree is faster than NCList for highly contained datasets but slower for simple datasets; and in all cases, AIList is more efficient than both AITree and NCList, see Table 2. AIList is more efficient than AITree because AIList has fewer extra comparison  $m$  due to the decomposition. Although both AIList and NCList use sublists, the numbers of their sublists are very different, see Table 3. AIList maintains a very small number of sublists ( $<10$  in all datasets we have tested), while NCList has 19 million linked sublists for a dataset of 128 million intervals. Since each sublist access involves a binary search, the query is slowed down. Thus, the key advantage of AIList over NCList is that it does not require *complete* decomposition, because it works relatively efficiently even with some containment; in contrast, the NCList data structure requires recursive sublist containment construction because it relies on a non-overlapping *guarantee* in the query algorithm.

| Runtime(s) | Dataset 1 | Dataset 2 | Dataset 3 | Dataset 4 | Dataset 5 | Dataset 6 |
|------------|-----------|-----------|-----------|-----------|-----------|-----------|
| AIList     | 0.086     | 0.12      | 0.681     | 2.352     | 14.560    | 34.418    |
| AITree     | 0.117     | 0.25      | 1.187     | 5.533     | 42.672    | 111.536   |
| NCList     | 0.075     | 0.157     | 0.883     | 3.391     | 22.983    | 57.657    |

Table 1. Construction time for AIList, AITree and NCList for datasets listed in Table 1 of the main text.

| Runtime(s) | Dataset 1 | Dataset 2 | Dataset 3 | Dataset 4 | Dataset 5 | Dataset 6 |
|------------|-----------|-----------|-----------|-----------|-----------|-----------|
| AIList     | 0.427     | 0.465     | 6.310     | 17.530    | 66.256    | 107.732   |
| AITree     | 0.666     | 0.705     | 22.671    | 68.706    | 303.796   | 482.278   |
| NCList     | 0.590     | 0.642     | 25.381    | 100.360   | 401.934   | 611.847   |

Table 2. Query time of AIList, AITree and NCList for datasets listed in Table 1 of the main text.

| Runtime(s) | Dataset 1 | Dataset 2 | Dataset 3 | Dataset 4 | Dataset 5 | Dataset 6  | Dataset 0 |
|------------|-----------|-----------|-----------|-----------|-----------|------------|-----------|
| AIList     | 1         | 2         | 6         | 8         | 7         | 7          | 6         |
| NCList     | 1         | 1,006     | 364,025   | 2,500,263 | 8,898,006 | 19,294,893 | 203,576   |

Table 3. Number of total sublist of AIList and NCList for the seven datasets listed in Table 1 of the main text.

## 3. Data sources

The test datasets “exons” and “fBrain-DS14718” were downloaded from the BEDTools website <http://quinlanlab.org/tutorials/bedtools/bedtools.html#what-are-these-files>. The other datasets used in comparisons were downloaded from the UCSC website <http://hgdownload.cse.ucsc.edu/goldenPath/hg19/database>. For simplicity, AITree, NCList and AIList ignore unplaced contigs, chrM and alternate haplotypes. We stripped off intervals from such contigs prior to use in comparisons. 1-3% regions of these datasets were stripped off, and these datasets (in BED format) are available at [code.databio.org/AIList](http://code.databio.org/AIList).

## 4. AIList source code

Source code for AIList is available at <http://github.com/databio/AIList>. We also provide the source code for AITree, and NCList which was downloaded from websites <https://github.com/biocore-ntnu/kerneltree/tree/master/src> and <https://github.com/hunt-genes/ncls/tree/master/ncls/src> respectively, along with methods to use them in comparative analysis to AIList.

## References

Layer, R.M. *et al.* (2013) Binary interval search: A scalable algorithm for counting interval intersections. *Bioinformatics*, **29**, 1–7.
